# Supplementary material
Source: Springer Nature journal article supplement (https://www.springermedizin.de/resource/supplementary/12885_2013_4292_MOESM2_ESM.pdf/9467640)

**A**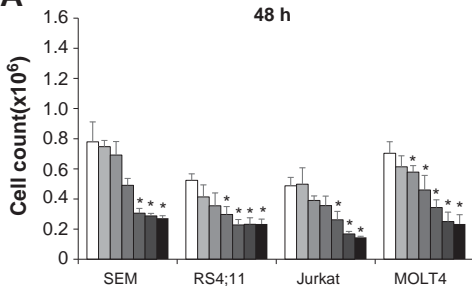**B**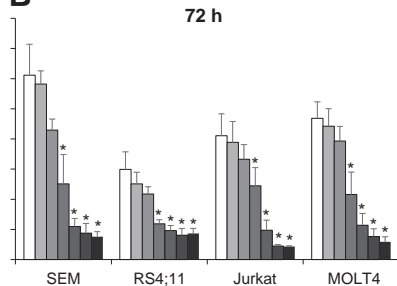**C**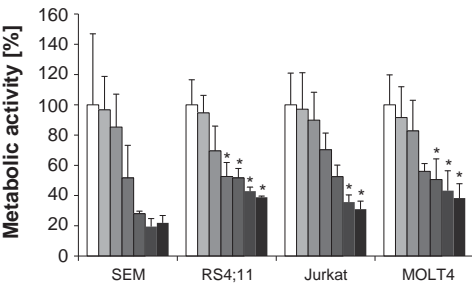**D**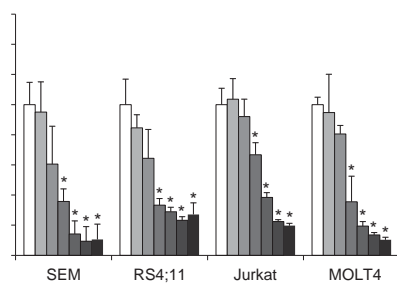

□ DMSO    □ 0.1  $\mu\text{M}$     □ 0.25  $\mu\text{M}$     □ 0.5  $\mu\text{M}$     □ 1  $\mu\text{M}$     □ 5  $\mu\text{M}$     □ 10  $\mu\text{M}$

Supplement: MOESM2 [file 9467640]
